# Supplementary material for: Effects of notoginseng leaf triterpenes on small molecule metabolism after cerebral ischemia/reperfusion injury assessed using MALDI–MS imaging
Source: PubMed Central journal article supplement — Ann Transl Med. 2021 Feb;9(3):246. doi: 10.21037/atm-20-4898 (PMC7940900; doi:10.21037/atm-20-4898), 2021-02
Supplement: atm-09-03-246-supplementary.pdf [file atm-09-03-246-supplementary.pdf]

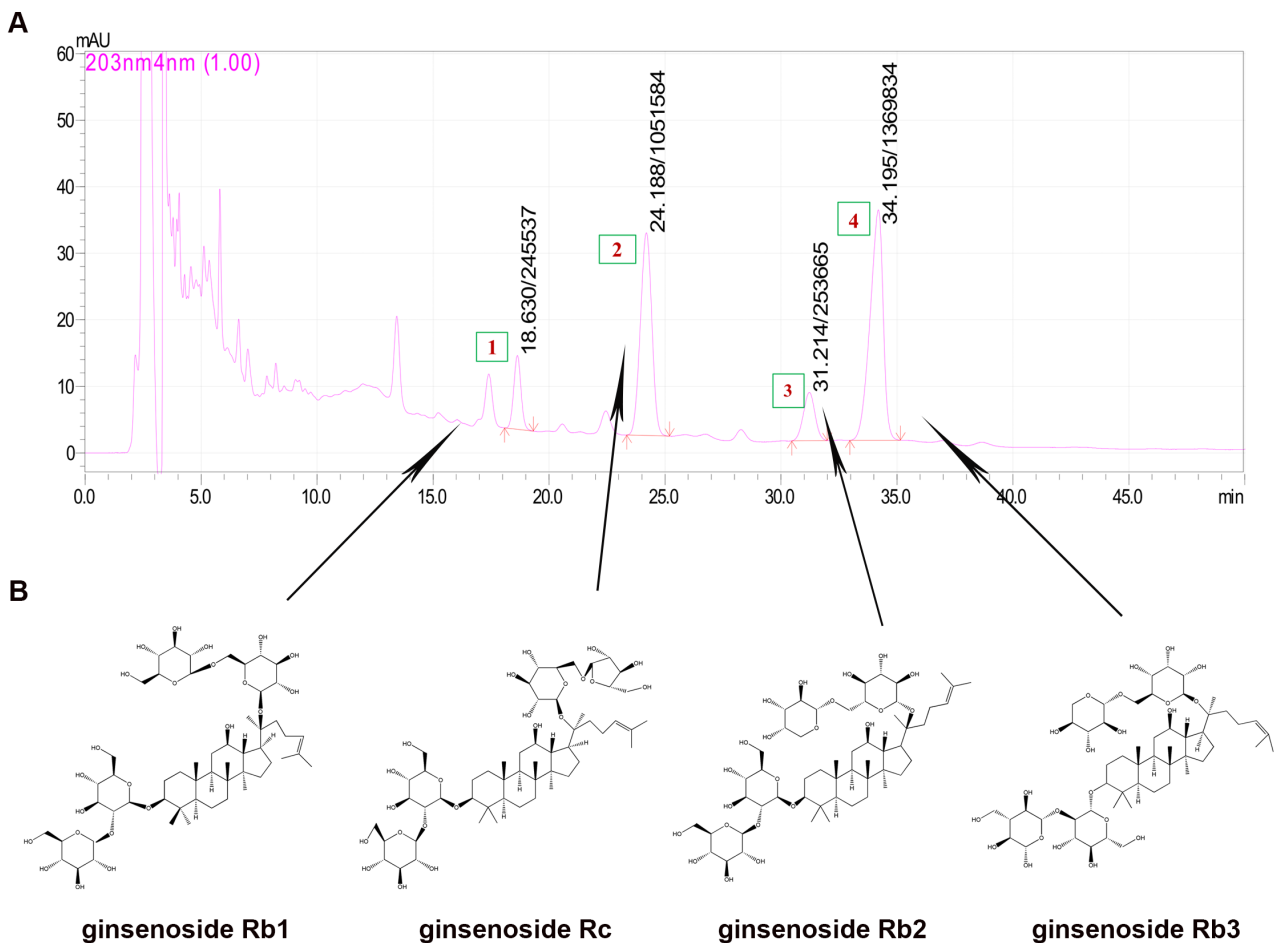

**Figure S1** The chromatograms and chemical components of PNGL detected by HPLC. (A) The chromatograms of PNGL samples. (B) Representative chemical component structures, primarily contains ginsenoside Rb1, ginsenoside Rc, ginsenoside Rb2, ginsenoside Rb3. PNGL, notoginseng leaf triterpenes; HPLC, high-performance liquid chromatography.

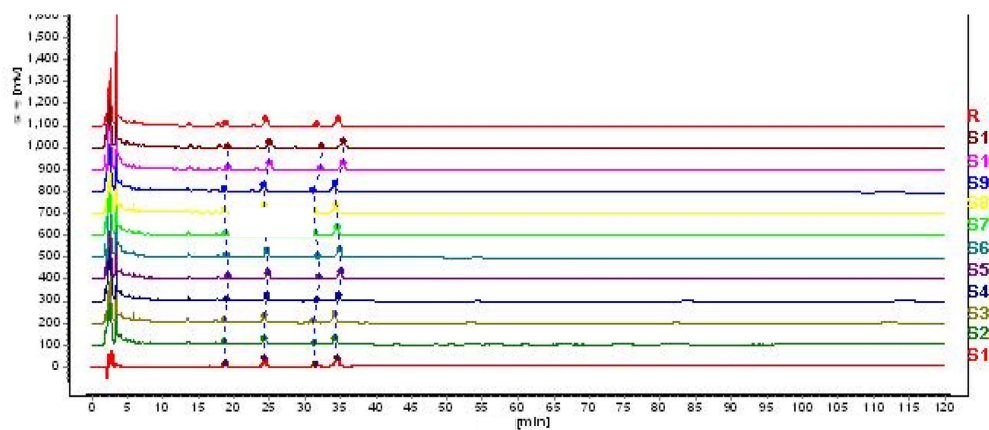

**Figure S2** The chemical fingerprinting of PNGL detected by the HPLC. The chemical fingerprinting from eleven batches of PNGL samples. PNGL, notoginseng leaf triterpenes; HPLC, high-performance liquid chromatography.
